# Supplementary material
Source: Springer Nature journal article supplement (https://www.springermedizin.de/resource/supplementary/13019_2011_501_MOESM2_ESM.pdf/9638498)

WT: 11.4  
AGE: 36  
DATE: 2007/07/27  
TIME: 15:22  
PAT: ZHONGSHAN  
HOSPITAL  
IDU  
07-11376

NO. 0020010001  
DATE: 7/27  
COMP: 60

14CH  
20Hz

2.14  
SEC

54  
12

A

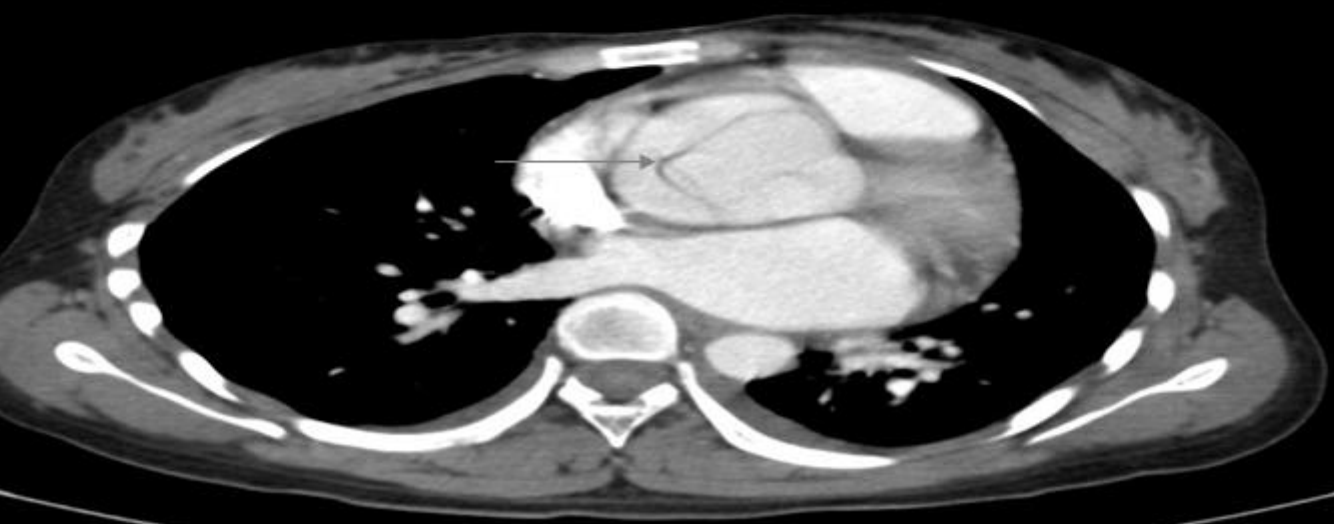

B

Supplement: MOESM2 [file 9638498]
